# Supplementary material for: GhostKnockoff inference empowers identification of putative causal variants in genome-wide association studies
Source: Springer Nature journal article supplement (doi:10.1038/s41467-022-34932-z), 2022-11-23
Supplement: 41467_2022_34932_MOESM1_ESM.pdf [file 41467_2022_34932_MOESM1_ESM.pdf]

1 **Supplementary Information for “GhostKnockoff inference empowers identification of putative**  
2 **causal variants in genome-wide association studies”**

3

4 Zihuai He<sup>1,2#</sup>, Linxi Liu<sup>3</sup>, Michael E. Belloy<sup>1</sup>, Yann Le Guen<sup>1,4</sup>, Aaron Sossin<sup>5</sup>, Xiaoxia Liu<sup>1</sup>, Xinran Qi<sup>1</sup>, Shiyang  
5 Ma<sup>6</sup>, Prashna K. Gyawali<sup>1</sup>, Tony Wyss-Coray<sup>1</sup>, Hua Tang<sup>7</sup>, Chiara Sabatti<sup>5</sup>, Emmanuel Candès<sup>8,9</sup>, Michael D.  
6 Greicius<sup>1</sup>, Iuliana Ionita-Laza<sup>6</sup>

7

8 <sup>1</sup>Department of Neurology and Neurological Sciences, Stanford University, Stanford, CA 94305, USA

9 <sup>2</sup>Quantitative Sciences Unit, Department of Medicine, Stanford University, Stanford, CA 94305, USA

10 <sup>3</sup>Department of Statistics, University of Pittsburgh, Pittsburgh, PA 15260, USA

11 <sup>4</sup>Institut du Cerveau - Paris Brain Institute - ICM, Paris, 75013, France

12 <sup>5</sup>Department of Biomedical Data Science, Stanford University, Stanford, CA 94305, USA

13 <sup>6</sup>Department of Biostatistics, Columbia University, New York, NY 10032, USA

14 <sup>7</sup>Department of Genetics, Stanford University, Stanford, CA 94305, USA

15 <sup>8</sup>Department of Statistics, Stanford University, Stanford, CA 94305, USA

16 <sup>9</sup>Department of Mathematics, Stanford University, Stanford, CA 94305, USA

17

18 # Correspondence to: Zihuai He (zihuai@stanford.edu)

1 **Supplementary Methods**

2 *Proof of single/multiple knockoffs based inference using summary statistics*

3 Assume the original variables have been normalized to have mean 0 and variance 1. For single knockoff,  
4 given individual-level data, we generate knockoffs  $\tilde{\mathbf{G}}$  by the conditional distribution given the original  
5 genetic variants:

6 
$$\tilde{\mathbf{G}}_i | \mathbf{G}_i \sim \mathcal{N}(\mathbf{G}_i \mathbf{P}^T, \mathbf{V}), \quad (1)$$

7 
$$\mathbf{P} = (\mathbf{I} - \mathbf{D}\boldsymbol{\Sigma}^{-1}), \quad \mathbf{V} = 2\mathbf{D} - \mathbf{D}\boldsymbol{\Sigma}^{-1}\mathbf{D}, \quad (2)$$

8 where  $\mathbf{I}$  is a  $p \times p$  identity matrix;  $\boldsymbol{\Sigma}$  is the correlation matrix of  $\mathbf{G}_i$  that characterizes the linkage  
9 disequilibrium;  $\mathbf{D} = \text{diag}(s_1, \dots, s_p)$  is a diagonal matrix given by solving the following convex  
10 optimization problem:

11 
$$\text{minimize } \sum_j |1 - s_j|, \text{ subject to } \begin{cases} 2\boldsymbol{\Sigma} - \mathbf{D} \succeq 0, \\ s_j \geq 0, \quad 1 \leq j \leq p. \end{cases} \quad (3)$$

12 The per-sample score statistic (original and knockoff) can be written as

13 
$$\mathbf{G}_i^T Y_i, \quad \tilde{\mathbf{G}}_i^T Y_i := \mathbf{P}\mathbf{G}_i^T Y_i + \boldsymbol{\Phi}_i^T Y_i, \quad (4)$$

14 where  $\boldsymbol{\Phi}_i = (\phi_{i1}, \dots, \phi_{ip}) \sim \mathcal{N}(0, \mathbf{V})$  is a vector of random variables that follows a multivariate normal  
15 distribution with mean 0 covariance  $\mathbf{V}$ . The score test statistic for original and knockoff variables are

16 
$$\mathbf{S} = \mathbf{G}^T \mathbf{Y}, \quad \tilde{\mathbf{S}} = \tilde{\mathbf{G}}^T \mathbf{Y} = \mathbf{P}\mathbf{G}^T \mathbf{Y} + \boldsymbol{\Phi}^T \mathbf{Y}, \quad (5)$$

17 where  $\mathbf{G}, \tilde{\mathbf{G}}, \boldsymbol{\eta}, \boldsymbol{\Phi}$  are all  $n \times p$  matrix stacking corresponding per-sample vectors;  $\mathbf{Y} = (Y_1, \dots, Y_n)^T$ . Since  
18 the rows of  $\boldsymbol{\Phi}$  follows i.i.d multivariate normal distribution  $\mathcal{N}(\mathbf{0}, \mathbf{V})$ , equivalently, we can write

19 
$$\tilde{\mathbf{S}} = \mathbf{P}\mathbf{S} + \sqrt{\sum_{i=1}^n Y_i^2} \cdot \mathbf{E} \quad (6)$$

20 where  $\mathbf{E}$  is a random vector following multivariate normal distribution  $\mathcal{N}(\mathbf{0}, \mathbf{V})$ . Then

21 
$$\tilde{\mathbf{Z}}_{score} | \mathbf{G}, \mathbf{Y} \sim \mathcal{N}\left(\mathbf{P}\mathbf{Z}_{score}, \frac{\sum_{i=1}^n Y_i^2}{n} \cdot \mathbf{V}\right). \quad (7)$$

22 Assuming  $Y_i$  has been centered at the conditional mean given the covariates and scaled with variance 1,  
23 under the null hypothesis ( $H_0: \boldsymbol{\beta} = 0$ ) as  $n \rightarrow \infty$

24 
$$\frac{\sum_{i=1}^n Y_i^2}{n} \rightarrow 1 \text{ in probability.} \quad (8)$$

25 Therefore, asymptotically, we can directly generate the score statistic for knockoff variables as

26 
$$\tilde{\mathbf{Z}}_{score} | \mathbf{G}, \mathbf{Y} \sim \mathcal{N}(\mathbf{P}\mathbf{Z}_{score}, \mathbf{V}). \quad (9)$$

27 For multiple knockoffs, we can generate multiple knockoffs  $\tilde{\mathbf{G}} = (\tilde{\mathbf{G}}^{(1)}, \dots, \tilde{\mathbf{G}}^{(M)})$  by the conditional  
28 distribution given the original genetic variants:

29 
$$\tilde{\mathbf{G}}_i | \mathbf{G}_i \sim \mathcal{N}(\mathbf{G}_i \mathbf{P}^T, \mathbf{V}), \quad (10)$$

$$1 \quad \mathbf{P} = \begin{pmatrix} \mathbf{I} - \mathbf{D}\boldsymbol{\Sigma}^{-1} \\ \dots \\ \mathbf{I} - \mathbf{D}\boldsymbol{\Sigma}^{-1} \end{pmatrix}, \quad \mathbf{V} = \begin{pmatrix} \mathbf{C} & \mathbf{C} - \mathbf{D} & \dots & \mathbf{C} - \mathbf{D} \\ \mathbf{C} - \mathbf{D} & \mathbf{C} & \dots & \mathbf{C} - \mathbf{D} \\ \dots & \dots & \dots & \dots \\ \mathbf{C} - \mathbf{D} & \mathbf{C} - \mathbf{D} & \dots & \mathbf{C} \end{pmatrix}, \quad (11)$$

2 where  $\mathbf{I}$  is a  $p \times p$  identity matrix;  $\boldsymbol{\Sigma}$  is the correlation matrix of  $\mathbf{G}_i$  that characterizes the linkage  
3 disequilibrium;  $\mathbf{C} = 2\mathbf{D} - \mathbf{D}\boldsymbol{\Sigma}^{-1}\mathbf{D}$ ;  $\mathbf{D} = \text{diag}(s_1, \dots, s_p)$  is a diagonal matrix given by solving the  
4 following convex optimization problem:

$$5 \quad \text{minimize } \sum_j |1 - s_j|, \text{ subject to } \begin{cases} \frac{M+1}{M}\boldsymbol{\Sigma} - \mathbf{D} \succeq 0 \\ s_j \geq 0, \quad 1 \leq j \leq p \end{cases} \quad (12)$$

6 Following similar derivations as for single knockoff, the score test statistic can be written as

$$7 \quad \mathbf{S} = \mathbf{G}^T \mathbf{Y}, \quad \tilde{\mathbf{S}} = \tilde{\mathbf{G}}^T \mathbf{Y} | \mathbf{G}, \mathbf{Y} \sim \mathcal{N}(\mathbf{P}\mathbf{S}, \left(\sum_{i=1}^n Y_i^2\right) \cdot \mathbf{V}), \quad (13)$$

8 where now  $\tilde{\mathbf{S}} = (\tilde{\mathbf{S}}^{(1)T}, \dots, \tilde{\mathbf{S}}^{(M)T})^T$  is a  $p \times M$  dimensional vector of knockoff score test statistics.

9 Asymptotically, we can still directly generate the test statistic for knockoff variables by

$$10 \quad \mathbf{Z}_{score} = \frac{1}{\sqrt{n}} \mathbf{S}, \quad \tilde{\mathbf{Z}}_{score} | \mathbf{G}, \mathbf{Y} \sim \mathcal{N}(\mathbf{P}\mathbf{Z}_{score}, \mathbf{V}). \quad (14)$$

11 The above derivation is based on hypothetically constructing model-X knockoffs. The advantage of the  
12 model-X framework mainly lies in the following two perspectives: first, it does not impose any constraints  
13 on the dimension, implying that the method can still provide valid inference even when the dimension is  
14 much larger than the sample size, which is particularly useful for analysis of GWAS/whole genome  
15 sequencing data; second, it does not make any assumption on the model for the conditional distribution of  
16 the outcome given genetic variables, i.e., the method can be applied to both continuous and binary traits.

17

1 **Supplementary Notes**

2 *Consistency between the estimated study correlations and similarities in the design of the considered*  
3 *Alzheimer's disease studies*

4 The estimated study correlations  $cor.S_{ij}$  (**Figure 4A**) are consistent with our knowledge of overlap and  
5 other factors, such as differences in phenotype definition, analysis strategies (e.g. statistical model), and  
6 quality control, that can affect the correlations between these studies. For example, Kunkle et al. (2019)  
7 and Schwartzenuber et al. (2021) are highly correlated partly because the latter study is a meta-analysis  
8 that includes summary statistics from Kunkle et al. (2019). The three WES studies (Bis et al. (2019), Le  
9 Guen et al. (2021) and our in-house ADSP whole-exome sequencing analysis) are all based on the ADSP  
10 cohorts with different preprocessing steps, therefore they appear highly correlated to each other. Some  
11 weaker correlations are observed for studies that use different phenotype definitions. For example, Huang  
12 et al. (2017) is weakly correlated with other major AD GWAS because the authors performed a time-to-  
13 event survival analysis; the correlation between Le Guen et al. (2021) and Bis et al. (2019) is weaker than  
14 that between our in-house ADSP WES analysis and Bis et al. (2019), because Le Guen et al. (2021) used a  
15 new age-informed AD phenotype instead of clinical AD.

16

# 1 Supplementary Figures

2 **Supplementary Figure 1: Empirical simulation studies for power and FDR to compare different knockoff generators.** Two  
3 cohorts are randomly sampled from the same population. The panels show power and FDR based on 1000 replicates for different  
4 types of traits (quantitative and dichotomous) and different levels of sample overlap (0%/25%/50%), with different target FDR  
5 varying from 0 to 0.2. All methods are based on single knockoff for a fair comparison. GhostKnockoff-S: the proposed single  
6 knockoff method based on the meta-analysis of Z-scores calculated separately from each individual cohort. SummaryStat knockoff-  
7 S: the proposed single knockoff method based on Z-scores from the pooled data; HMM/SCIP/SecondOrder knockoff-S: existing  
8 knockoff generators based on individual level data; We additionally present HMM knockoff+Lasso-S, which corresponds to the  
9 KnockoffZoom method proposed by Sesia et al. (2020) at single variant resolution.

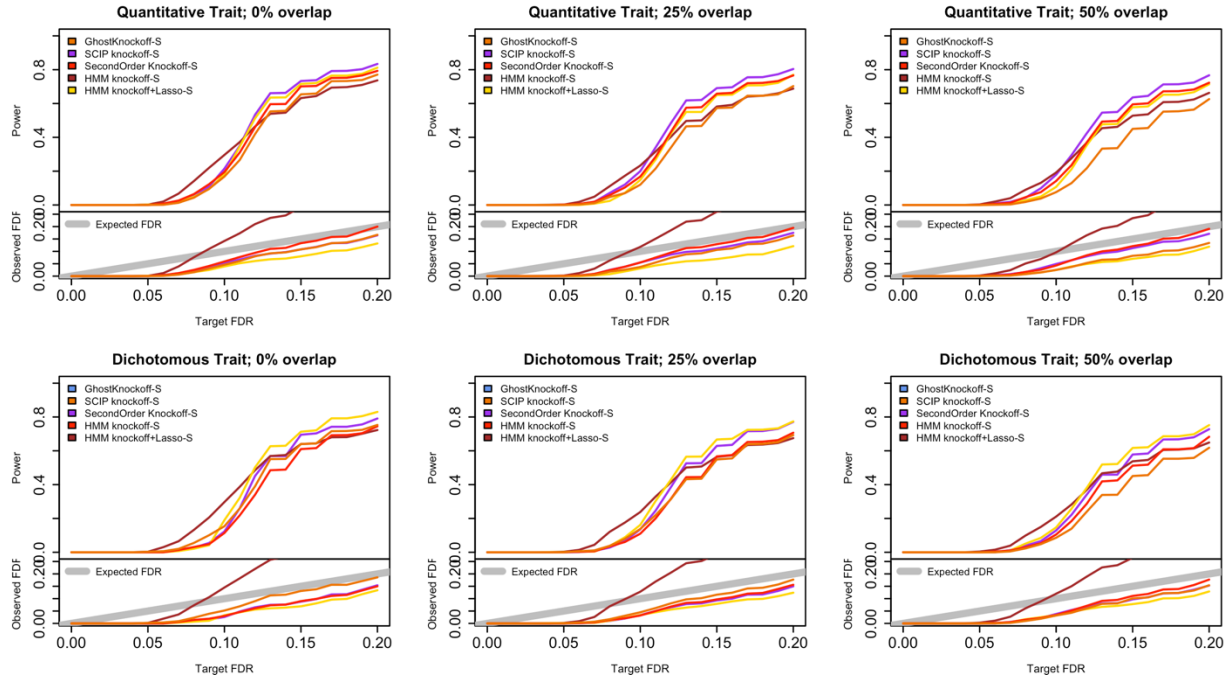

10

11

1 **Supplementary Figure 2: Empirical simulation studies for power and FDR in the presence of study specific variants.** Two  
 2 cohorts are randomly sampled from the same population with 25% sample overlap. The panels show power and FDR based on  
 3 1000 replicates for different types of traits (quantitative and dichotomous), and different levels of unobserved variants per study  
 4 (0%/10%/20%), with different target FDR varying from 0 to 0.2. GhostKnockoff-M/S: the proposed multiple/single knockoff  
 5 method based on the meta-analysis of Z-scores calculated separately from each individual cohort. IndividualData Knockoff-M/S:  
 6 the multiple/single knockoff inference based on applying SecondOrder knockoff generator to pooled individual level data. All  
 7 methods are based on the same definition of feature importance score.

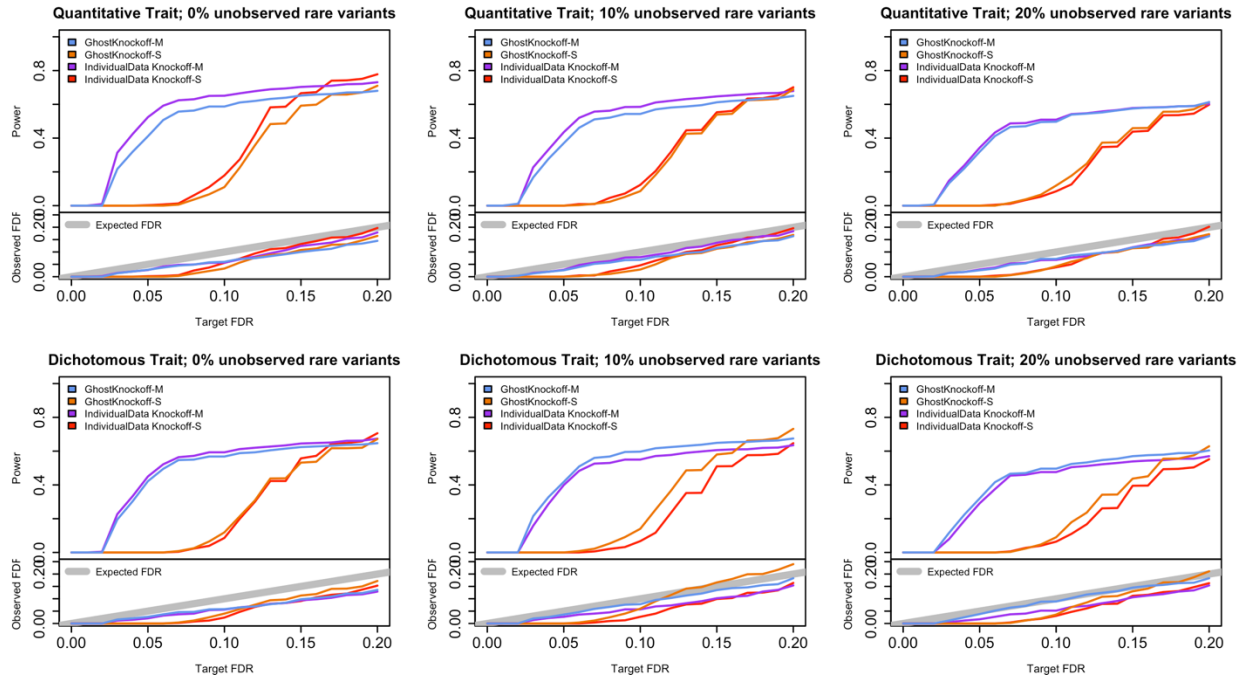

8  
9

1 **Supplementary Figure 3: Replication of variants and loci identified by GhostKnockoff in larger studies.** The analysis reflects  
 2 the application of the proposed method to a subset of samples and the validation of the findings when we increase the sample size.  
 3 We present the Manhattan plot of W statistics (truncated at 100 for clear visualization) from GhostKnockoff with target FDR at  
 4 0.05 (red dotted line; loci are highlighted in red) and 0.10 (blue dotted line; loci are highlighted in blue). **A.** GhostKnockoff analysis  
 5 based on summary statistics from Kunkle et al. (2019). **B.** GhostKnockoff analysis based on summary statistics from  
 6 Schwartzenruber et al. (2021), a study aggregating samples from Kunkle et al. (2019) and UK Biobank based on a proxy AD  
 7 phenotype. **C.** The proposed GhostKnockoff meta-analysis based on the optimal weights combining nine studies. Variant density  
 8 is shown at the bottom of Manhattan plot (number of variants per 1Mb).

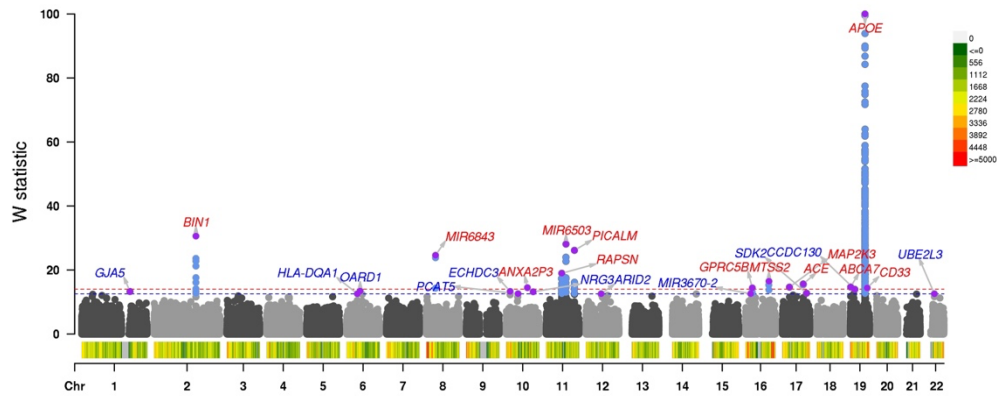

9

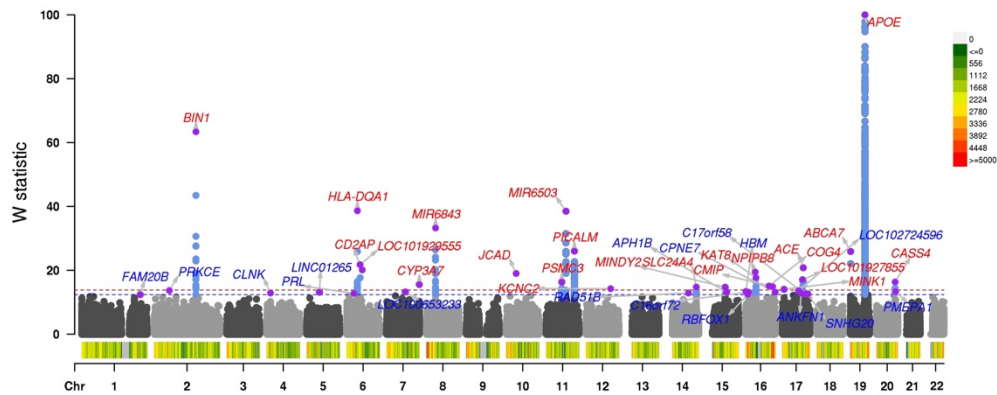

10

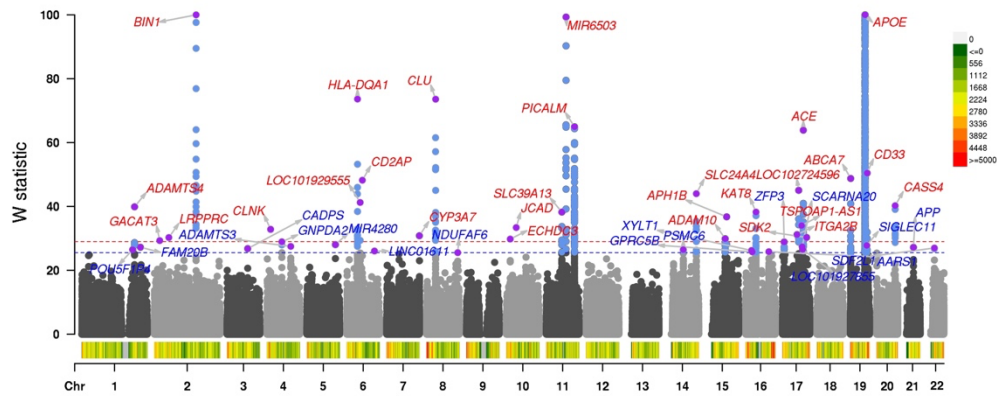

11

12

1 **Supplementary Figure 4: Comparison between sample size weights (top panel; 29 loci at FDR 0.05; 46 loci at FDR 0.10)**  
 2 **vs. optimal weights (bottom panel; 34 loci at FDR 0.05; 50 loci at FDR 0.10).** We present the Manhattan plot of W statistics  
 3 (truncated at 100 for clear visualization) from GhostKnockoff with target FDR at 0.05 (red) and 0.10 (blue). Variant density is  
 4 shown at the bottom of Manhattan plot (number of variants per 1Mb).

5

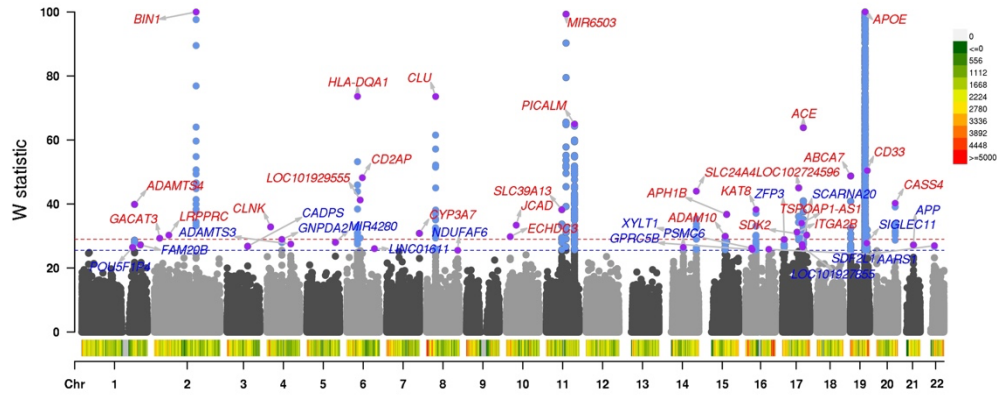

6

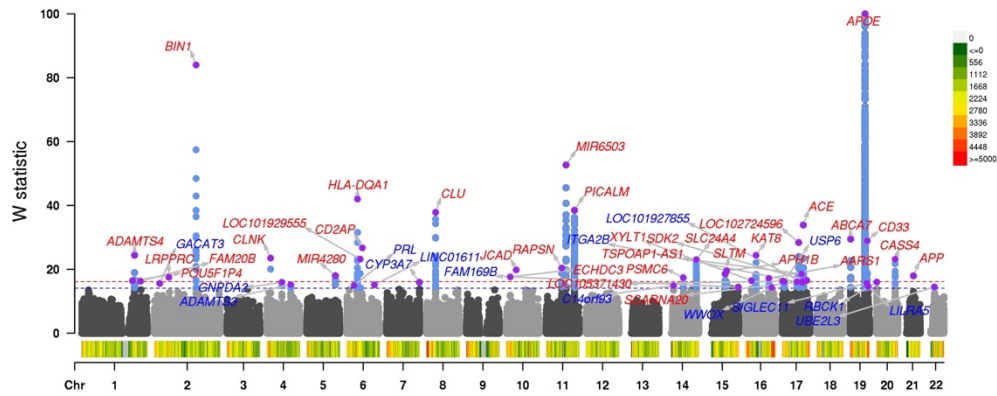

7



1 **Supplementary Figure 5: Functional enrichment analysis.** Functional scores of variants identified by different methods are  
 2 compared using one-sided t-tests. Overlap: GWAS discoveries that overlap with knockoff inference.

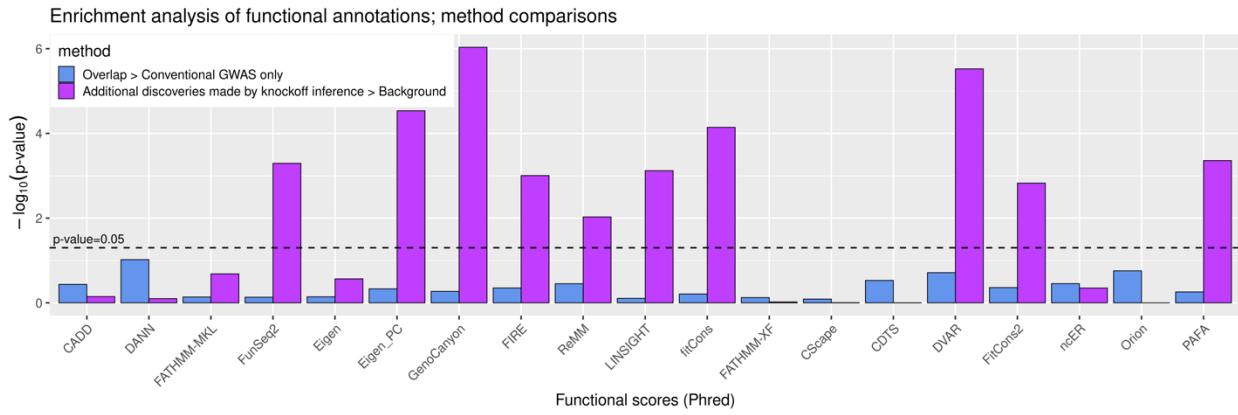

3  
 4  
 5

1 **Supplementary Tables**

2 **Supplementary Table 1. Replication of variants identified by GhostKnockoff in larger studies.** The analysis reflects the  
 3 application of the proposed method to a subset of samples and the validation of the findings when we increase the sample size. We  
 4 present the number of identified variants by applying GhostKnockoff to summary statistics from Kunkle et al. (2019),  
 5 Schwartzentruber et al. (2021) (a study aggregating samples from Kunkle et al. (2019) and UK Biobank based on a proxy AD  
 6 phenotype), and the proposed GhostKnockoff meta-analysis based on the optimal weights combining nine studies. A genetic variant  
 7 is replicated if the same variant is also identified in the next larger study with a smaller p-value and the same direction of effect.

|          |                                                  | Source of summary statistics |                                   |                                               |
|----------|--------------------------------------------------|------------------------------|-----------------------------------|-----------------------------------------------|
|          |                                                  | Kunkle et al.<br>(2019)      | Schwartzentruber et al.<br>(2021) | Proposed meta-analysis of all<br>nine studies |
| FDR=0.05 | Total number of discoveries                      | 385                          | 634                               | 764                                           |
|          | Number (proportion) of<br>replicated discoveries | 338 (87.8%)                  | 447 (70.5%)                       | -                                             |
| FDR=0.10 | Total number of discoveries                      | 448                          | 724                               | 935                                           |
|          | Number (proportion) of<br>replicated discoveries | 370 (82.6%)                  | 510 (70.4%)                       | -                                             |

8 FDR: False discovery rate.

1 **Supplementary Table 2. Loci associated with Alzheimer's disease at FDR=0.05.** For each locus, we present the representative variant with the largest W-statistic and the nearest  
 2 gene within +-1Mb. The physical positions of each variant are given in build hg38.

| Variant         | Proximal Gene | MAF   | q      | Jansen et al. | Kunkle et al. | Schwartzentruber et al. | Bis et al. WES | In-house ADGC | In-house ADSP WES | In-house ADSP WGS | LeGuan et al. WES | Huang et al. | Direction of effects | scRNAseq DEG minP |
|-----------------|---------------|-------|--------|---------------|---------------|-------------------------|----------------|---------------|-------------------|-------------------|-------------------|--------------|----------------------|-------------------|
| 1:155419060:A:T | POU5F1P4      | 0.024 | 0.0448 | 1.1E-04       | 3.3E-03       | 2.2E-04                 | NA             | 4.9E-01       | NA                | 6.8E-01           | NA                | 1.1E-02      | +++0+0+0+            | NA                |
| 1:161185602:G:A | ADAMTS4       | 0.242 | 0.0035 | 1.9E-10       | 2.4E-02       | 4.3E-08                 | NA             | 7.9E-02       | NA                | 1.5E-02           | NA                | 3.3E-01      | +++0+0+0+            | 6.60E-55          |
| 1:178992361:C:T | FAM20B        | 0.028 | 0.0477 | 1.1E-03       | 4.0E-02       | 4.0E-05                 | NA             | 7.1E-01       | NA                | 9.8E-01           | NA                | 3.8E-02      | +++0-0+0+            | 2.00E-01          |
| 2:44026309:T:C  | LRPPRC        | 0.026 | 0.0302 | 1.4E-04       | 6.0E-02       | 3.9E-04                 | NA             | 2.4E-02       | NA                | 2.7E-04           | NA                | 2.2E-01      | ---0-0-0-            | 9.60E-05          |
| 2:127135234:C:T | BIN1          | 0.38  | 0.0007 | 1.3E-29       | 4.1E-28       | 1.1E-54                 | NA             | 2.2E-27       | NA                | 3.9E-11           | NA                | 4.5E-07      | +++0+0+0+            | 6.20E-08          |
| 4:11026080:T:C  | CLNK          | 0.282 | 0.0056 | 4.2E-09       | 5.7E-05       | 8.1E-11                 | NA             | 4.2E-05       | NA                | 3.2E-02           | NA                | 8.5E-03      | ---0-0-0-            | 3.70E-01          |
| 5:87002714:C:T  | MIR4280       | 0.191 | 0.0250 | 2.1E-06       | 1.7E-02       | 4.5E-05                 | NA             | 1.7E-06       | NA                | 9.4E-03           | NA                | 3.7E-03      | +++0+0+0+            | NA                |
| 6:32637301:A:G  | HLA-DQA1      | 0.05  | 0.0007 | 1.1E-09       | 2.7E-05       | 2.5E-14                 | NA             | NA            | NA                | NA                | NA                | 2.0E-01      | ---00000+            | 1.70E-01          |
| 6:40783137:A:T  | LOC101929555  | 0.014 | 0.0059 | 3.7E-05       | 1.4E-05       | 4.4E-08                 | NA             | 3.0E-03       | NA                | 4.3E-02           | NA                | NA           | 0                    | NA                |
| 6:47479305:T:A  | CD2AP         | 0.251 | 0.0027 | 9.2E-09       | 1.9E-07       | 1.0E-09                 | NA             | 1.5E-07       | NA                | 2.3E-02           | NA                | 6.0E-02      | +++0+0+0+            | 1.00E-04          |
| 8:27598736:T:C  | CLU           | 0.405 | 0.0012 | 1.1E-17       | 6.0E-16       | 2.9E-24                 | NA             | 9.0E-07       | NA                | 1.4E-01           | NA                | 1.8E-04      | +++0+0+0+            | 1.20E-07          |
| 10:11678621:C:T | ECHDC3        | 0.349 | 0.0293 | 7.5E-08       | 8.7E-06       | 1.6E-10                 | NA             | 4.2E-08       | NA                | 1.3E-02           | NA                | 4.8E-04      | +++0+0+0+            | 2.70E-01          |
| 10:29966853:G:A | JCAD          | 0.016 | 0.0154 | 2.0E-04       | 4.1E-02       | 5.2E-06                 | NA             | 1.9E-01       | NA                | 6.3E-01           | NA                | NA           | 0                    | 1.60E-06          |
| 11:47440232:A:G | RAPSN         | 0.374 | 0.0134 | 1.8E-06       | 1.2E-07       | 1.1E-09                 | NA             | 1.0E-02       | NA                | 2.9E-02           | NA                | 1.4E-02      | +++0+0+0+            | 1.70E-01          |
| 11:60212842:C:G | MIR6503       | 0.401 | 0.0007 | 2.1E-13       | 3.0E-15       | 5.6E-18                 | NA             | 2.4E-09       | NA                | 1.7E-03           | NA                | 4.1E-02      | ---0-0-0-            | NA                |
| 11:86089237:G:A | PICALM        | 0.349 | 0.0012 | 2.1E-17       | 1.0E-14       | 2.5E-25                 | NA             | 7.0E-08       | NA                | 2.7E-03           | NA                | 4.5E-11      | +++0+0+0+            | 1.90E-07          |
| 14:52710264:A:C | PSMC6         | 0.114 | 0.0321 | 2.0E-05       | 2.6E-04       | 1.4E-08                 | NA             | 2.4E-02       | NA                | NA                | NA                | 2.0E-03      | +++0+000+            | 1.20E-03          |
| 14:92469490:G:A | SLC24A4       | 0.23  | 0.0062 | 2.2E-09       | 1.4E-06       | 5.4E-10                 | NA             | 2.6E-03       | NA                | 3.5E-03           | NA                | 2.4E-02      | ---0-0-0-            | 1.50E-02          |
| 15:58889786:G:A | SLTM          | 0.255 | 0.0209 | 2.7E-07       | 1.0E-02       | 7.3E-06                 | NA             | 3.3E-03       | NA                | 1.2E-01           | NA                | 3.9E-03      | +++0+0+0+            | 7.10E-04          |
| 15:63277703:C:T | APH1B         | 0.135 | 0.0159 | 3.4E-08       | 2.4E-04       | 1.1E-08                 | 1.4E-02        | 9.9E-03       | 3.3E-01           | 4.0E-02           | 1.1E-01           | 2.3E-01      | +++++++              | 1.90E-02          |
| 16:17478817:T:C | XYLT1         | 0.221 | 0.0444 | 7.8E-04       | 1.3E-02       | 5.8E-04                 | NA             | 6.2E-01       | NA                | 6.5E-01           | NA                | 3.7E-03      | +++0+0+0+            | 9.50E-06          |
| 16:31121341:G:A | KAT8          | 0.296 | 0.0035 | 3.8E-08       | 7.6E-03       | 6.3E-09                 | NA             | 4.1E-03       | NA                | 1.3E-01           | NA                | 2.0E-02      | ---0-0-0-            | 1.60E-01          |
| 16:70258841:T:C | AARS1         | 0.203 | 0.0331 | 1.8E-03       | 4.6E-03       | 7.3E-04                 | NA             | 3.5E-01       | NA                | 7.3E-01           | NA                | 7.5E-04      | ---0-0-0-            | NA                |
| 17:388402:T:C   | LOC105371430  | 0.42  | 0.0471 | 1.2E-03       | 1.3E-01       | 1.5E-04                 | NA             | 5.5E-01       | NA                | 9.1E-01           | NA                | 1.2E-02      | +++0+0+0+            | NA                |

3

1 **Supplementary Table 2 (continue). Loci associated with Alzheimer's disease at FDR=0.05.** For each locus, we present the representative variant with the largest W-statistic and  
 2 the nearest gene within +-1Mb. The physical positions of each variant are given in build hg38.

| Variant         | Proximal Gene | MAF   | q      | Jansen et al. | Kunkle et al. | Schwartzentruber et al. | Bis et al. WES | In-house ADGC | In-house ADSP WES | In-house ADSP WGS | LeGuan et al. WES | Huang et al. | Direction of effects | scRNAseq DEG minP |
|-----------------|---------------|-------|--------|---------------|---------------|-------------------------|----------------|---------------|-------------------|-------------------|-------------------|--------------|----------------------|-------------------|
| 17:49391824:G:A | LOC102724596  | 0.427 | 0.0025 | 1.7E-07       | 1.0E-02       | 5.1E-05                 | NA             | 4.2E-02       | NA                | 9.3E-01           | NA                | 2.5E-02      | ---0-0+0-            | NA                |
| 17:58320645:C:G | TSPOAP1-AS1   | 0.448 | 0.0209 | 2.6E-08       | 8.5E-06       | 3.3E-05                 | NA             | 2.0E-03       | NA                | 6.6E-02           | NA                | 6.0E-01      | ---0-0-0-            | 1.3E-02           |
| 17:60239372:C:T | SCARNA20      | 0.199 | 0.0492 | 1.3E-03       | 4.4E-03       | 2.1E-03                 | NA             | 9.7E-01       | NA                | 1.7E-01           | NA                | 8.8E-03      | +++0-0+0+            | NA                |
| 17:63482562:C:T | ACE           | 0.388 | 0.0017 | 3.9E-07       | 3.9E-04       | 1.5E-07                 | 5.4E-02        | 8.7E-05       | 3.7E-02           | 1.4E-02           | 7.5E-03           | 6.3E-03      | +++++++              | 1.2E-02           |
| 17:73384739:C:T | SDK2          | 0.204 | 0.0420 | 8.5E-04       | 1.4E-03       | 1.7E-04                 | NA             | 3.1E-02       | NA                | 9.5E-01           | NA                | 8.0E-02      | ---0-0+0-            | 6.4E-02           |
| 19:1046077:C:T  | ABCA7         | 0.116 | 0.0025 | 2.6E-07       | 1.4E-03       | 7.9E-11                 | NA             | 3.9E-03       | NA                | 5.1E-02           | NA                | 6.3E-01      | +++0+0+0+            | 1.1E-02           |
| 19:44908684:T:C | APOE          | 0.154 | 0.0007 | 0.0E+00       | 0.0E+00       | 0.0E+00                 | NA             | NA            | NA                | NA                | NA                | 2.6E-131     | +++00000+            | 2.0E-16           |
| 19:51224706:C:A | CD33          | 0.31  | 0.0025 | 5.2E-09       | 3.6E-07       | 1.3E-08                 | NA             | 1.7E-04       | NA                | 7.1E-05           | NA                | 6.8E-04      | ---0-0-0-            | 2.0E-01           |
| 20:56443204:T:C | CASS4         | 0.08  | 0.0059 | 2.6E-08       | 9.3E-06       | 1.8E-08                 | NA             | 1.1E-06       | NA                | 1.9E-02           | NA                | 8.6E-04      | ---0-0-0-            | 1.3E-14           |
| 21:26161943:T:C | APP           | 0.371 | 0.0252 | 4.2E-07       | 1.2E-03       | 1.0E-07                 | NA             | 6.3E-04       | NA                | NA                | NA                | 1.1E-01      | +++0+000+            | 3.2E-16           |

3 WES: whole genome sequencing; WGS: whole genome sequencing; ADGC: Alzheimer's Disease Genetics Consortium; ADSP: Alzheimer's Disease Sequencing Project; DEG:  
 4 differentially expression gene; minP; minimum p-value.

5

1 **Supplementary Table 3.** Accession IDs for the cohorts included in the in-house genome-wide associations study imputed using the TOPMed reference  
 2 panels.

| <b>Cohort/Project</b>         | <b>Sample count</b> | <b>Data Repository</b>                |
|-------------------------------|---------------------|---------------------------------------|
| A4                            | 3465                | LONI A4                               |
| ACT                           | 2790                | NIAGADS (NG00034) / dbGaP (phs000234) |
| ADC1                          | 2731                | NIAGADS (NG00022) / NACC              |
| ADC2                          | 928                 | NIAGADS (NG00023) / NACC              |
| ADC3                          | 1526                | NIAGADS (NG00024) / NACC              |
| ADC4                          | 1054                | NIAGADS (NG00068) / NACC              |
| ADC5                          | 1224                | NIAGADS (NG00069) / NACC              |
| ADC6                          | 1333                | NIAGADS (NG00070) / NACC              |
| ADC7                          | 1462                | NIAGADS (NG00071) / NACC              |
| ADDNEUROMED                   | 315                 | Synapse AddNeuroMed (syn4907804)      |
|                               | 329                 | Synapse AddNeuroMed (syn4907804)      |
| ADNI                          | 757                 | LONI ADNI                             |
|                               | 361                 | LONI ADNI                             |
|                               | 327                 | LONI ADNI                             |
|                               | 812                 | LONI ADNI                             |
|                               | 812                 | LONI ADNI                             |
| ADNI-DOD                      | 204                 | LONI ADNIDOD                          |
| ADGC<br>Exome-Arrays          | 5180                | NIAGADS (NG00081) / NACC              |
|                               | 1923                | NIAGADS (NG00080) / NACC              |
|                               | 5998                | NIAGADS (NG00079) / NACC              |
|                               | 868                 | NIAGADS (NG00085) / NACC              |
| ADSP WES                      | 20503               | NIAGADS DSS (NG00067.v5) / NACC       |
| ADSP WGS                      | 16906               | NIAGADS DSS (NG00067.v5) / NACC       |
| Indianapolis African-American | 1175                | NIAGADS (NG00047)                     |
| Indianapolis Yoruba           | 1264                | dbGaP (phs000378)                     |
| CIDR                          | 3101                | NIAGADS (NG00015) / dbGAP (phs000496) |
| GenADA                        | 1571                | dbGaP (phs000219)                     |

|            |      |                                                             |
|------------|------|-------------------------------------------------------------|
| HBTRC      | 338  | Synapse AMP-AD (syn3159435)                                 |
|            | 402  | Synapse AMP-AD (syn3159435)                                 |
| LATC       | 63   | RADC Rush (contact:Gregory_Klein@rush.edu)                  |
| NIA-LOAD   | 5220 | NIAGADS (NG00020)                                           |
| MARS       | 708  | RADC Rush (contact:Gregory_Klein@rush.edu)                  |
| MAYO       | 2099 | Synapse AMP-AD (syn5591675) / NIAGADS (NG00029)             |
|            | 349  | Synapse AMP-AD (syn22264775)                                |
| MAYO2      | 314  | Synapse AMP-AD (syn5550404)                                 |
|            | 349  | Synapse AMP-AD (syn22264775)                                |
| MIRAGE     | 397  | NIAGADS (NG00031)                                           |
|            | 1105 | NIAGADS (NG00031)                                           |
| MSBB       | 349  | Synapse AMP-AD (syn3159438, syn22264775)                    |
| MTC        | 542  | NIAGADS (NG00096)                                           |
| OHSU       | 647  | NIAGADS (NG00017)                                           |
| ROSMAP     | 1126 | RADC Rush (contact:Gregory_Klein@rush.edu) / Synapse AMP-AD |
|            | 582  | RADC Rush (contact:Gregory_Klein@rush.edu) / Synapse AMP-AD |
|            | 382  | RADC Rush (contact:Gregory_Klein@rush.edu) / Synapse AMP-AD |
|            | 494  | RADC Rush (contact:Gregory_Klein@rush.edu)                  |
|            | 1196 | RADC Rush (contact:Gregory_Klein@rush.edu) / Synapse AMP-AD |
| TARCC      | 625  | NIAGADS (NG00097)                                           |
|            | 2718 | TARCC (contact: Bruce.Jones@UTSouthwestern.edu)             |
| TGEN2      | 1599 | NIAGADS (NG00028)                                           |
| UPITT      | 2440 | NIAGADS (NG00026)                                           |
| UM/VU/MSSM | 1153 | NIAGADS (NG00042)                                           |
|            | 864  | NIAGADS (NG00042)                                           |
|            | 445  | NIAGADS (NG00042)                                           |
| WASHU      | 670  | NIAGADS (NG00030)                                           |
| WASHU2     | 235  | NIAGADS (NG00087)                                           |
| WHICAP     | 647  | NIAGADS (NG00093)                                           |

1

2
